# Supplementary material
Source: Springer Nature journal article supplement (https://www.springermedizin.de/resource/supplementary/12967_2013_1901_MOESM1_ESM.pdf/9575078)

**Ipilimumab Dose Titration**  
**<sup>51</sup>Cr Release Assay COLO356/FG**

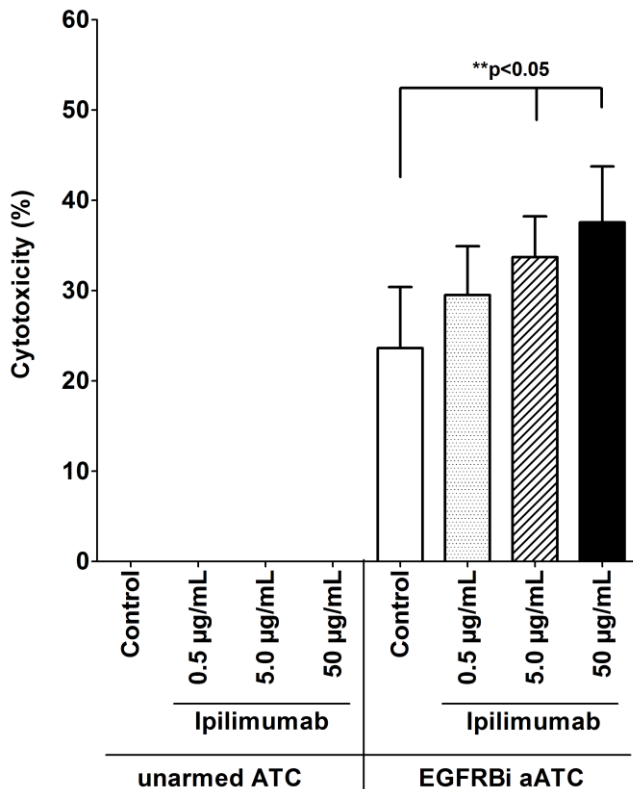

**Ipilimumab Dose Titration**  
**<sup>51</sup>Cr Release Assay Daudi**

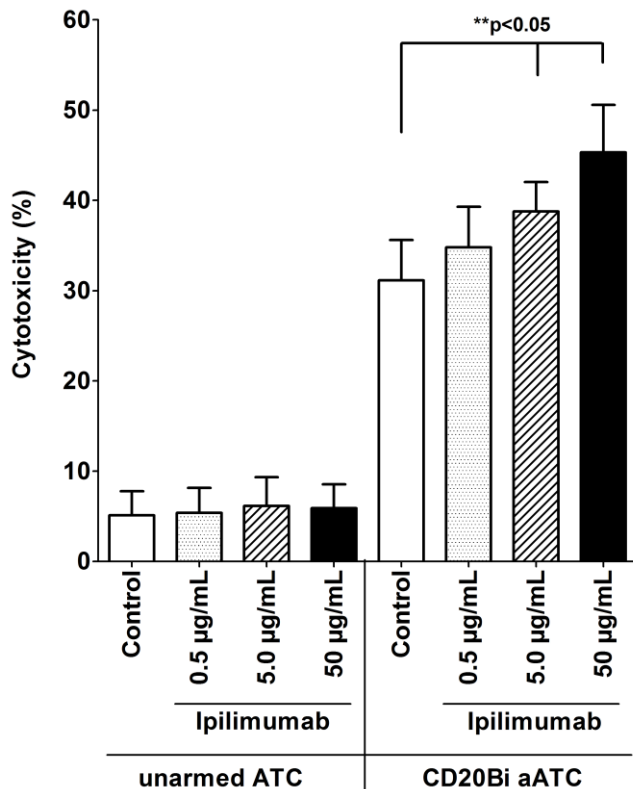

Supplement: MOESM1 [file 9575078]
